# Supplementary material for: Innovative Living Mulch Management Strategies for Organic Conservation Field Vegetables: Evaluation of Continuous Mowing, Flaming, and Tillage Performances
Source: MDPI journal article supplement (doi:10.3390/agronomy12030622), 2022-03-02
Supplement: s1 [file s1]

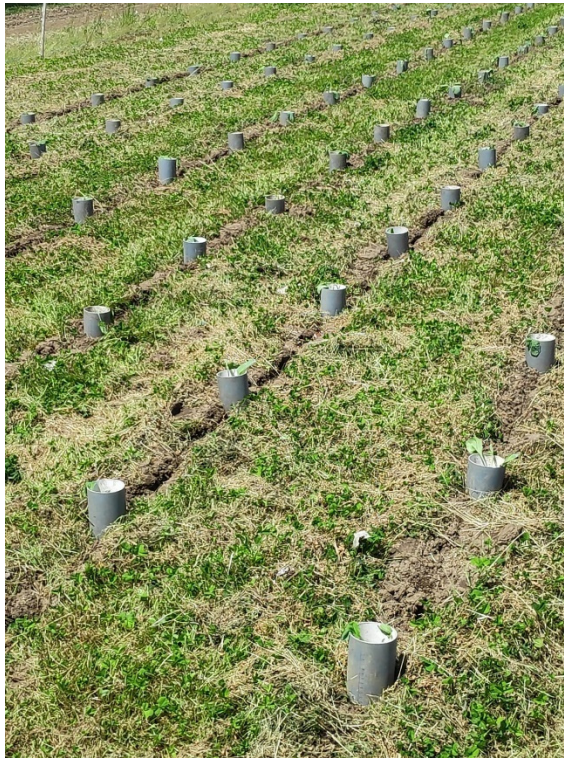

**Figure S1.** Particulars of LM-AM plot with plastic cylinders mounted at the base of each plant to avoid plant damage.

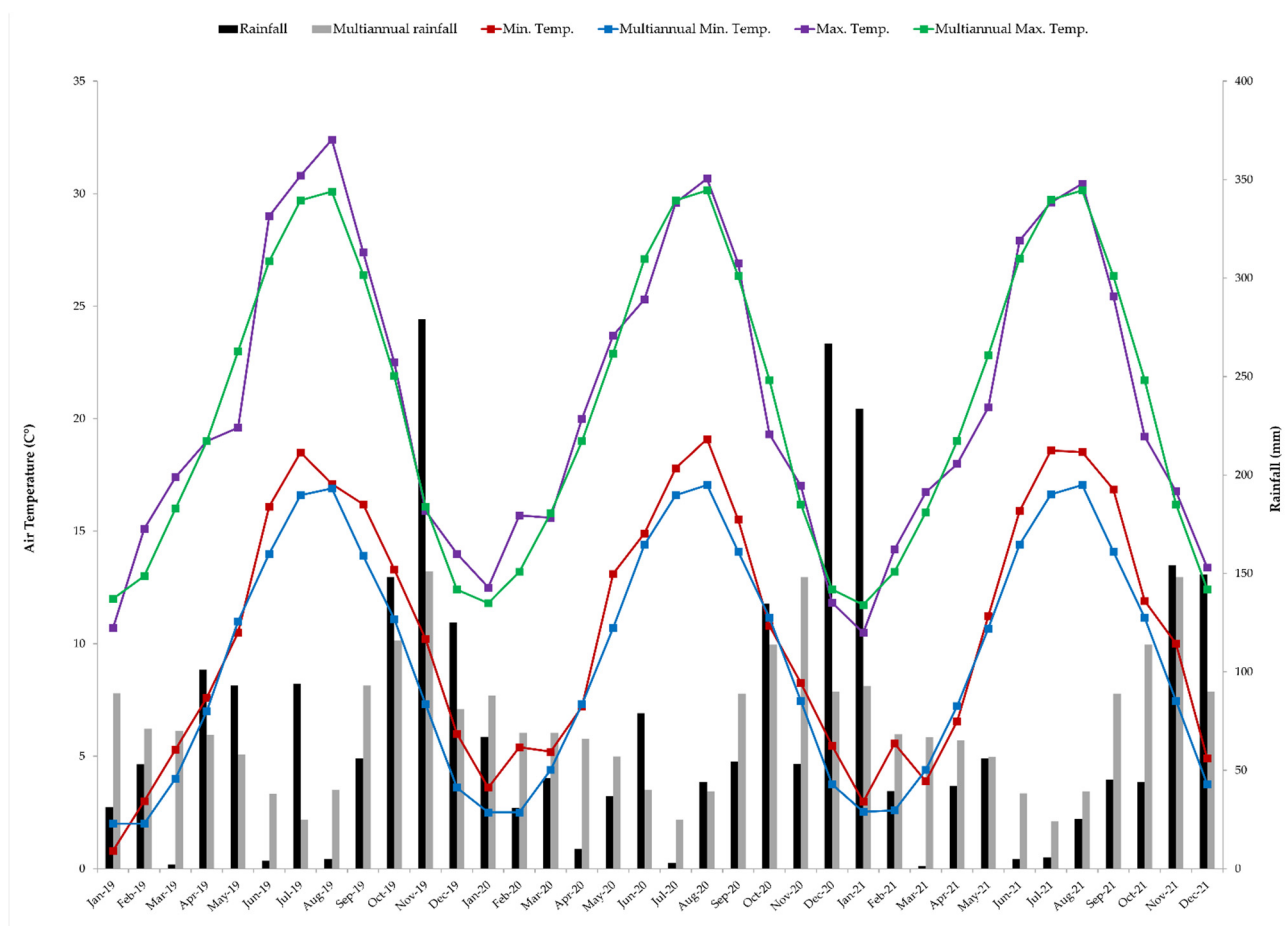

**Figure S2.** Monthly total rainfall (mm) and mean maximum and minimum air temperature (°C) from January 2019 to December 2021 compared to multiannual mean values (1993–2021).

**Table S1.** Results of general linear model analysis (type III) testing the effects of the independent variable block, treatments, years, and their interaction on cauliflower fresh marketable yield.

| Source           | Sum of Squares<br>(type III) | DF | Mean Squares | F       | <i>p</i> -value |
|------------------|------------------------------|----|--------------|---------|-----------------|
| Model            | 288.343                      | 7  | 41.192       | 1.433   | ns              |
| Intercept        | 17591.530                    | 1  | 17591.530    | 612.025 | ***             |
| Year             | 23.536                       | 1  | 23.536       | 0.819   | ns              |
| Treatment        | 105.243                      | 2  | 52.621       | 1.831   | ns              |
| Treatment × Year | 101.548                      | 2  | 50.774       | 1.766   | ns              |
| Block            | 58.017                       | 2  | 29.008       | 1.009   | ns              |
| Error            | 1322.184                     | 46 | 28.743       | -       | -               |
| Total            | 19202.057                    | 54 | -            | -       | -               |

\*\*\* Significant at 0.001 probability level. ns, not significant at 0.05 probability level. DF: degree of freedom. F: is the calculated Fisher value as the ratio between the variances.

**Table S2.** Results of general linear model analysis (type III) testing the effects of the independent variable block, treatments, years, and their interaction on cauliflower plant dry weight.

| Source           | Sum of Squares<br>(type III) | DF | Mean Squares | F        | <i>p</i> -value |
|------------------|------------------------------|----|--------------|----------|-----------------|
| Model            | 12.622                       | 7  | 1.803        | 4.418    | ***             |
| Intercept        | 458.378                      | 1  | 458.378      | 1122.991 | ***             |
| Year             | 1.023                        | 1  | 1.023        | 2.505    | ns              |
| Treatment        | 7.402                        | 2  | 3.701        | 9.067    | ***             |
| Treatment × Year | 3.811                        | 2  | 1.906        | 4.669    | *               |
| Block            | 0.387                        | 2  | 0.193        | 0.474    | ns              |
| Error            | 18.776                       | 46 | 0.408        | -        | -               |
| Total            | 489.776                      | 54 | -            | -        | -               |

\*\*\*, \* Significant at 0.001 and 0.05 probability level, respectively. ns, not significant at 0.05 probability level.

**Table S3.** Results of generalized linear model analysis testing the effects of the independent variable block, treatments, years, and their interaction on weed dry biomass in cauliflower fields.

| Source           | Wald $\chi^2$ | DF | <i>p</i> -value |
|------------------|---------------|----|-----------------|
| Intercept        | 6153.796      | 1  | ***             |
| Year             | 9.371         | 1  | **              |
| Treatment        | 17.180        | 2  | ***             |
| Treatment × Year | 8.883         | 2  | *               |
| Block            | 1.335         | 2  | ns              |

\*\*\*, \*\*, \*, Significant at 0.001, 0.0, and 0.05 probability level, respectively. ns, not significant at 0.05 probability level.

**Table S4.** Results of general linear model analysis (type III) testing the effects of the independent variable block, treatments, years, and their interaction on the aboveground dry biomass of the LM growing in cauliflower fields.

| Source           | Sum of Squares<br>(type III) | DF | Mean Squares | F      | <i>p</i> -value |
|------------------|------------------------------|----|--------------|--------|-----------------|
| Model            | 276562.721                   | 5  | 55312.544    | 7.100  | ***             |
| Intercept        | 630171.361                   | 1  | 630171.361   | 80.890 | ***             |
| Year             | 246.490                      | 1  | 246.490      | 0.032  | ns              |
| Treatment        | 142606.934                   | 1  | 142606.934   | 18.305 | ***             |
| Treatment × Year | 36087.334                    | 1  | 36087.334    | 4.632  | *               |
| Block            | 97621.962                    | 2  | 48810.981    | 6.266  | **              |

|       |             |    |          |   |   |
|-------|-------------|----|----------|---|---|
| Error | 233712.758  | 30 | 7790.425 | - | - |
| Total | 1140446.840 | 36 | -        | - | - |

\*\*\*, \*\*, \*, Significant at 0.001, 0.0, and 0.05 probability level, respectively. ns, not significant at 0.05 probability level.

**Table S5.** Results of general linear model analysis (type III) testing the effects of the independent variable block, treatments, years, and their interaction on eggplant fresh marketable production.

| Source           | Sum of Squares<br>(type III) | DF | Mean Squares | F       | p-value |
|------------------|------------------------------|----|--------------|---------|---------|
| Model            | 9034.832                     | 7  | 1290.690     | 13.751  | ***     |
| Intercept        | 71889.889                    | 1  | 71889.889    | 765.915 | ***     |
| Year             | 37.376                       | 1  | 37.376       | 0.398   | ns      |
| Treatment        | 7882.376                     | 2  | 3941.188     | 41.989  | ***     |
| Treatment × Year | 743.916                      | 2  | 371.958      | 3.963   | *       |
| Block            | 371.165                      | 2  | 185.582      | 1.977   | ns      |
| Error            | 4317.629                     | 46 | 93.862       | -       | -       |
| Total            | 85242.350                    | 54 | -            | -       | -       |

\*\*\*, \* Significant at 0.001 and 0.05 probability level, respectively. ns, not significant at 0.05 probability level.

**Table S6.** Results of general linear model analysis (type III) testing the effects of the independent variable block, treatments, years, and their interaction on eggplant dry weights.

| Source           | Sum of Squares<br>(type III) | DF | Mean Squares | F       | p-value |
|------------------|------------------------------|----|--------------|---------|---------|
| Model            | 23.103                       | 7  | 3.300        | 5.811   | ***     |
| Intercept        | 212.260                      | 1  | 212.260      | 373.711 | ***     |
| Year             | 3.755                        | 1  | 3.755        | 6.611   | *       |
| Treatment        | 12.145                       | 2  | 6.072        | 10.691  | ***     |
| Treatment × Year | 6.954                        | 2  | 3.477        | 6.122   | **      |
| Block            | 0.250                        | 2  | 0.125        | 0.220   | ns      |
| Error            | 26.127                       | 46 | 0.568        | -       | -       |
| Total            | 261.490                      | 54 | -            | -       | -       |

\*\*\*, \*\*, \* Significant at 0.001, 0.01, and 0.05 probability level, respectively. ns, not significant at 0.05 probability level.

**Table S7.** Results of general linear model analysis (type III) testing the effects of the independent variable block, treatments, years, and their interaction on eggplant weed dry biomass.

| Source           | Sum of Squares<br>(type III) | DF | Mean Squares | F       | p-value |
|------------------|------------------------------|----|--------------|---------|---------|
| Model            | 231030.731                   | 7  | 3705366.632  | 16.886  | ***     |
| Intercept        | 2122603.282                  | 1  | 57041666.667 | 259.955 | ***     |
| Year             | 37547.452                    | 1  | 3616160.667  | 16.480  | ***     |
| Treatment        | 121446.347                   | 2  | 8640935.647  | 39.379  | ***     |
| Treatment × Year | 69539.867                    | 2  | 2481545.282  | 11.309  | ***     |
| Block            | 2497.065                     | 2  | 38221.949    | 0.174   | ns      |
| Error            | 261270.471                   | 46 | 219428.792   | -       | -       |
| Total            | 2614904.484                  | 54 | -            | -       | -       |

\*\*\*, \*\* Significant at 0.001 and 0.01 probability level, respectively. ns, not significant at 0.05 probability level.

**Table S8.** Results of generalized linear model analysis testing the effects of the independent variable block, treatments, years, and their interaction on the aboveground dry biomass of the LM growing in eggplant fields.

| Source                  | Wald $\chi^2$ | DF | <i>p</i> -value |
|-------------------------|---------------|----|-----------------|
| Intercept               | 88.469        | 1  | ***             |
| Year                    | 0.101         | 1  | ns              |
| Treatment               | 54.227        | 1  | ***             |
| Treatment $\times$ Year | 0.574         | 1  | ns              |
| Block                   | 0.027         | 2  | ns              |

\*\*\* Significant at 0.001 probability level. ns, not significant at 0.05 probability level.
